# Supplementary material for: A reusable surface-quaternized nanocellulose-based hybrid cryogel loaded with N-doped TiO2for self-integrated adsorption/photo-degradation of methyl orange dye
Source: Royal Society of Chemistry journal article supplement (doi:10.1039/c7ra00450h), 2017-01-01
Supplement: c7ra00450h1.pdf [file c7ra00450h1.pdf]

**A reusable surface-quaternized nanocellulose-based hybrid cryogel loaded with N-doped TiO<sub>2</sub> for self-integrated adsorption/photo-degradation of methyl orange dye**

Yufei Chen<sup>a</sup>, Hongzhi Liu<sup>a,b\*</sup>, Biyao Geng<sup>a</sup>, Jing Ru<sup>a</sup>, Chen Cheng<sup>a</sup>, Likui Wang<sup>c\*</sup>

<sup>a</sup>School of Engineering, Zhejiang Agriculture and Forestry University, Lin'an, Hangzhou, Zhejiang Province, 311300, China.

<sup>b</sup>National Engineering and Technology Research Center of Wood-based Resources Comprehensive Utilization, Lin'an, Hangzhou, Zhejiang Province, 311300, China.

<sup>c</sup>School of Chemical and Materials Engineering, Jiangnan University, Wuxi, Jiangsu Province, 214122, China.

\* Corresponding author: Email: hzliu@iccas.ac.cn (H. Liu); lkwang@jiangnan.edu.cn (L. Wang).

**SUPPORTING INFORMATION**

## Supporting Tables and Figures

Table S1 BET specific surface area values and porous characteristics of the Q-NFC based cryogels

| Samples     | $S_{\text{BET}}$ (m <sup>2</sup> /g) | Total pore volume<br>(cm <sup>3</sup> ·g <sup>-1</sup> ) | Average pore diameter (nm) |
|-------------|--------------------------------------|----------------------------------------------------------|----------------------------|
| Q-NFC       | 24.31                                | 0.041                                                    | 14.67                      |
| 10N-NFC     | 19.54                                | 0.037                                                    | 12.15                      |
| 10Ti-NFC    | 16.12                                | 0.028                                                    | 11.17                      |
| 10N10Ti-NFC | 17.42                                | 0.032                                                    | 12.01                      |

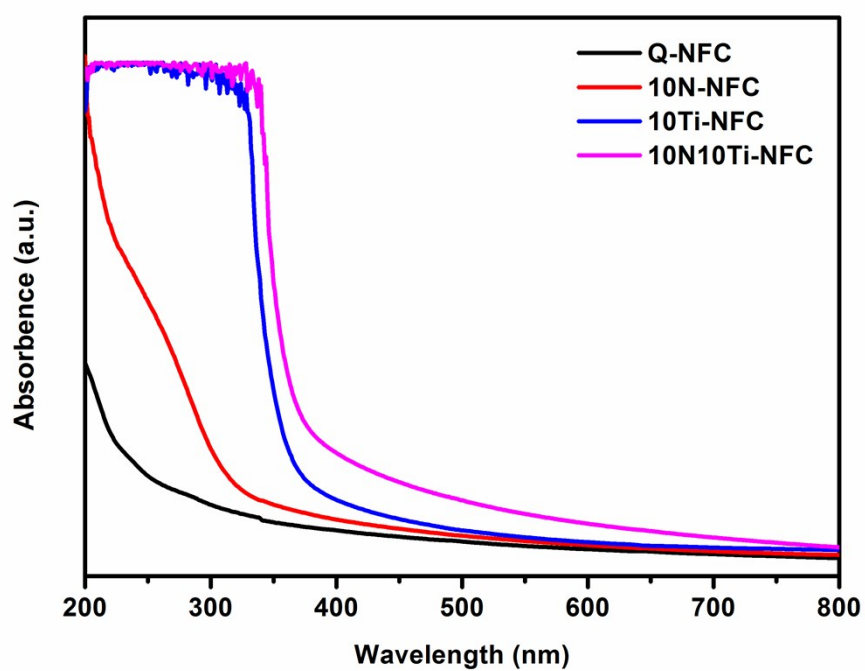

**Figure S1.** UV-Visible absorption spectra for the Q-NFC and Q-NFC based cryogels.

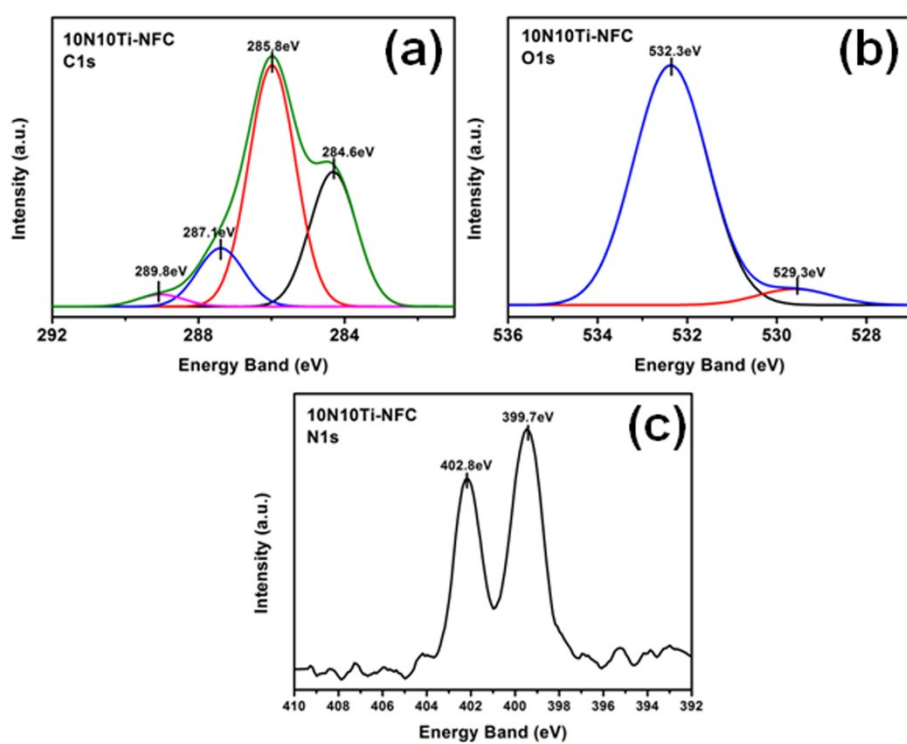

**Figure S2.** C1s (a), O1s (b) and N1s (c) XPS spectra of the 10N10Ti-NFC cryogel.

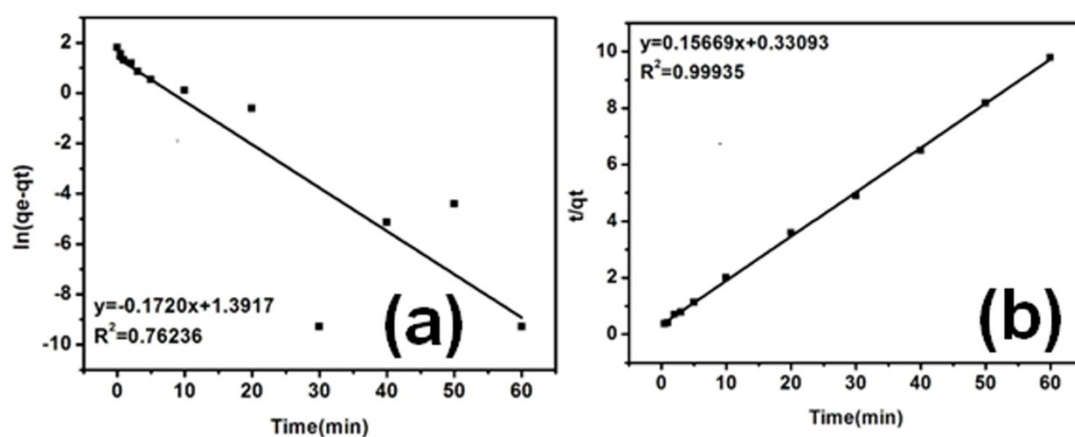

**Figure S3.** Fitting curves of MO adsorption data with pseudo-first-order model (a) and pseudo-second-order model (b) for 10N10Ti-NFC cryogel, respectively.

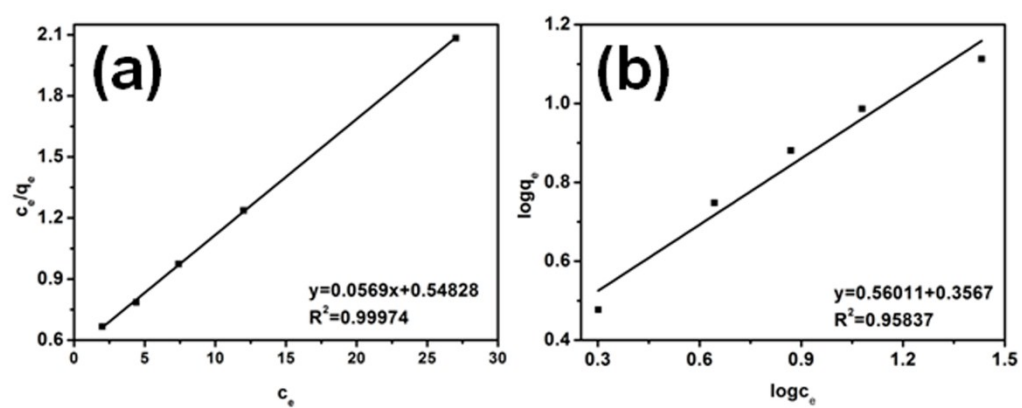

**Figure S4.** Isotherm plots of Langmuir (a) and Freundlich (b) for the adsorption of MO on 10N10Ti-NFC ( $1 \text{ g L}^{-1}$ ) at  $20^\circ\text{C}$  (Note: the initial concentrations of MO were 5, 10, 15, 20 and  $40 \text{ mg}\cdot\text{L}^{-1}$ ).

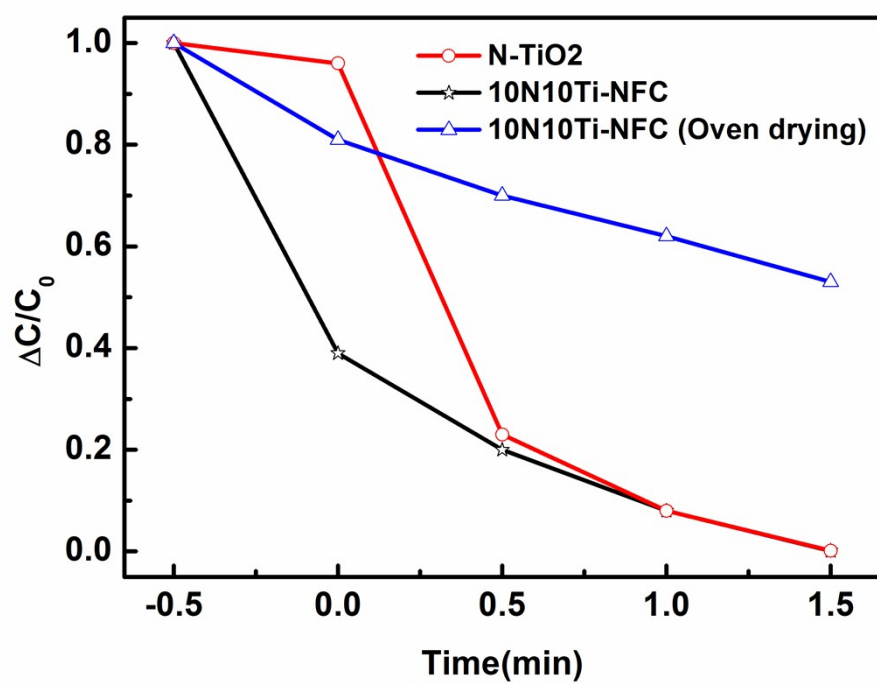

**Figure S5.** The photo-degradation performance of the N-TiO<sub>2</sub>, 10N10Ti-NFC (freeze drying) and 10N10Ti-NFC (oven drying) under the irradiation of simulated solar light.

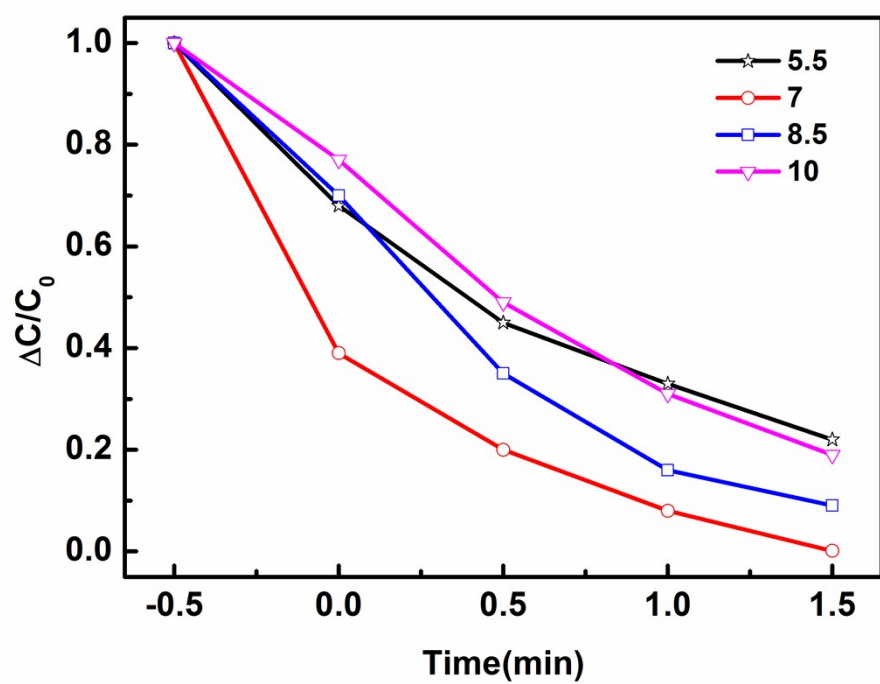

**Figure S6.** Effect of pH value on photo-degradation performance of 10N10Ti-NFC.
